# Supplementary material for: Ultrafine and highly dispersed platinum nanoparticles confined in a triazinyl-containing porous organic polymer for catalytic applications
Source: Royal Society of Chemistry journal article supplement (doi:10.1039/c8nr05756g), 2018-01-01
Supplement: c8nr05756g1.pdf [file c8nr05756g1.pdf]

**Ultrafine and Highly Dispersed Platinum Nanoparticles Confined in a Triazinyl-Containing Porous Organic Polymer for Catalytic Applications**

Hong Zhao, Guiqin Yu, Man Yuan, Jin Yang, Dan Xu and Zhengping Dong\*

College of Chemistry and Chemical Engineering, Gansu Provincial Engineering Laboratory for Chemical Catalysis, Laboratory of Special Function Materials and Structure Design of the Ministry of Education, Lanzhou University, Lanzhou 730000, PR China

Corresponding author.

E-mail address: [dongzhp@lzu.edu.cn](mailto:dongzhp@lzu.edu.cn) (Zhengping Dong).

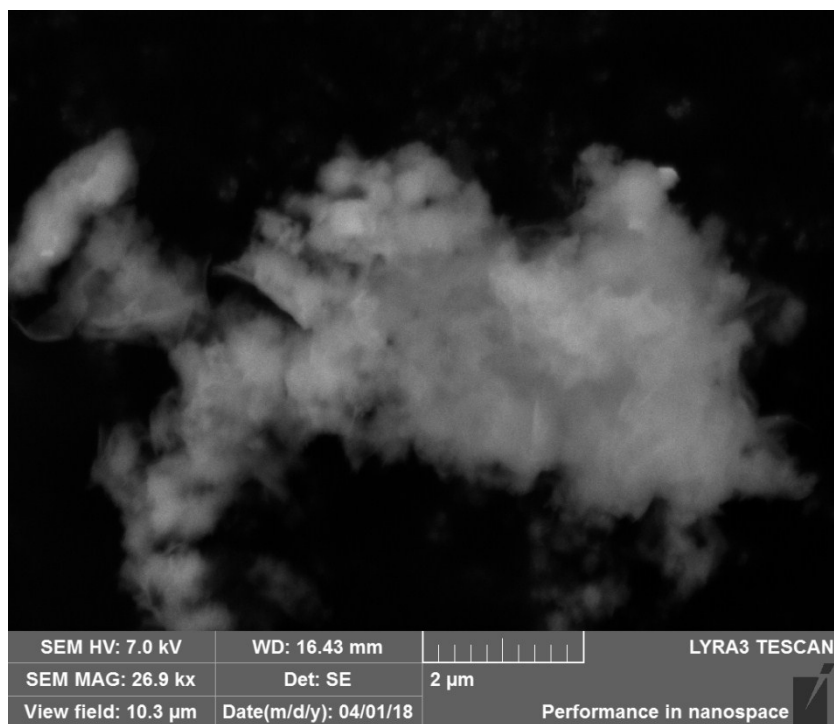

**Fig. S1.** SEM image of PC-POP.

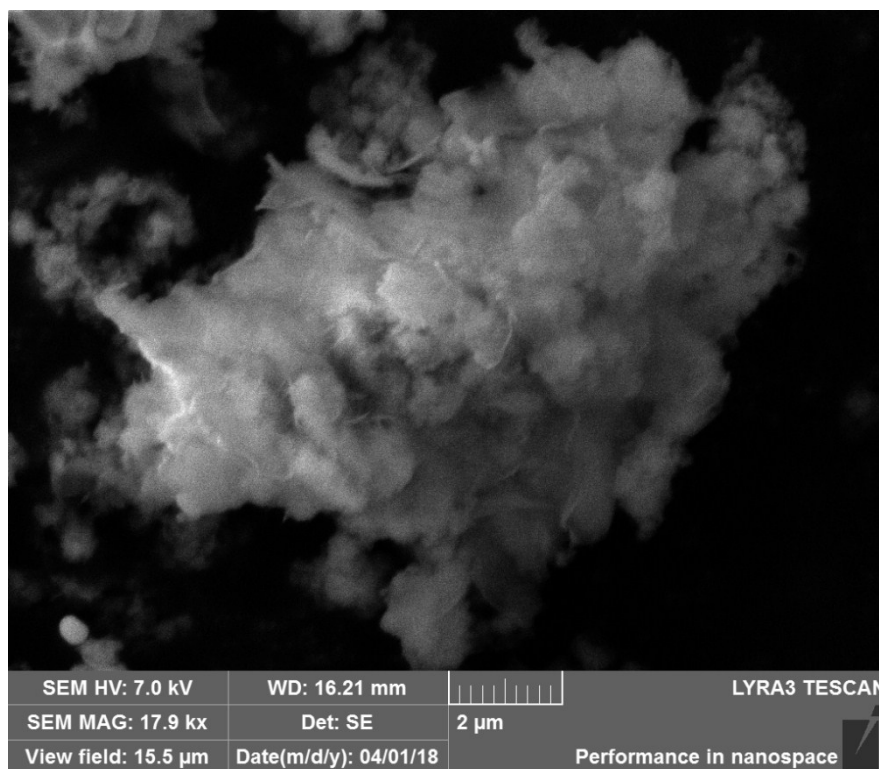

**Fig. S2.** SEM image of Pt@PC-POP.

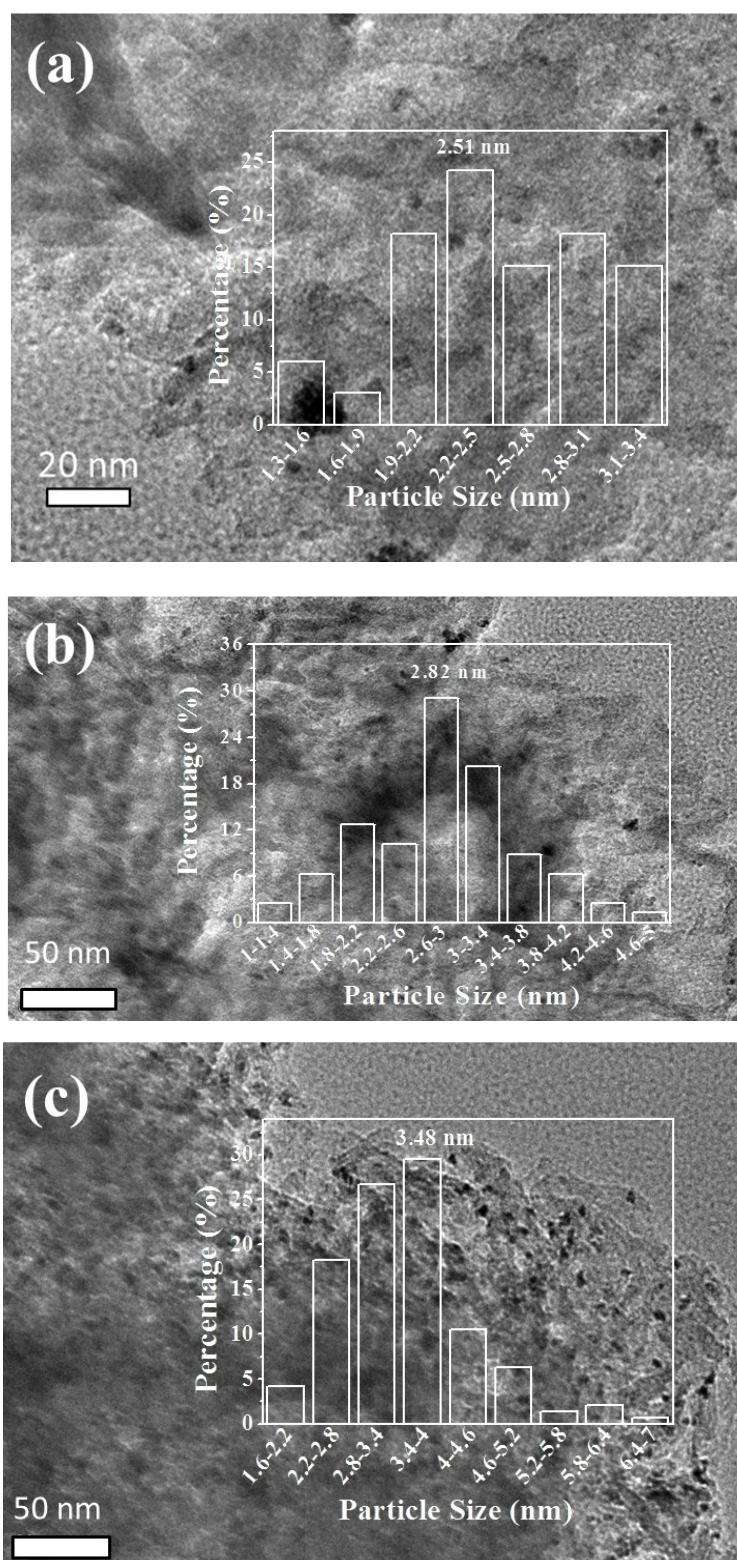

**Fig. S3.** TEM images of (a) Pt(1.16%)@PC-POP, (b) Pt(3.49%)@PC-POP, and (c) Pt(8.15%)@PC-POP

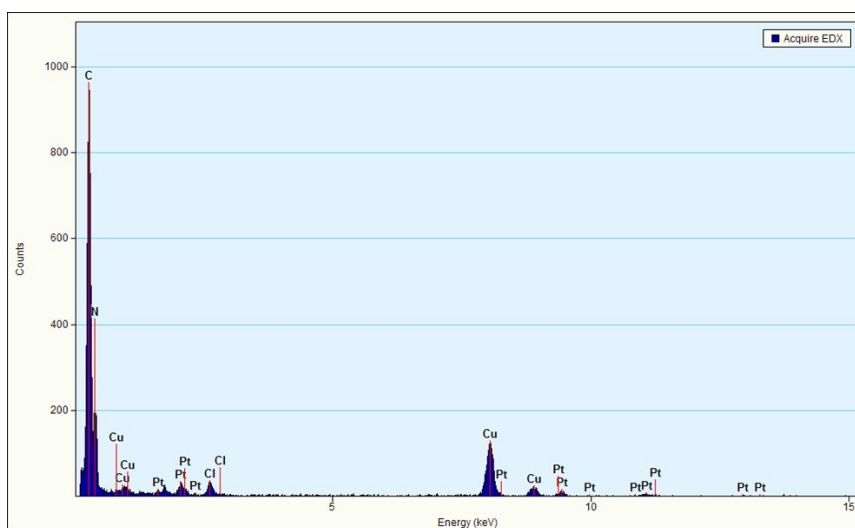

**Fig. S4.** The EDX spectrum of Pt@PC-POP catalysts

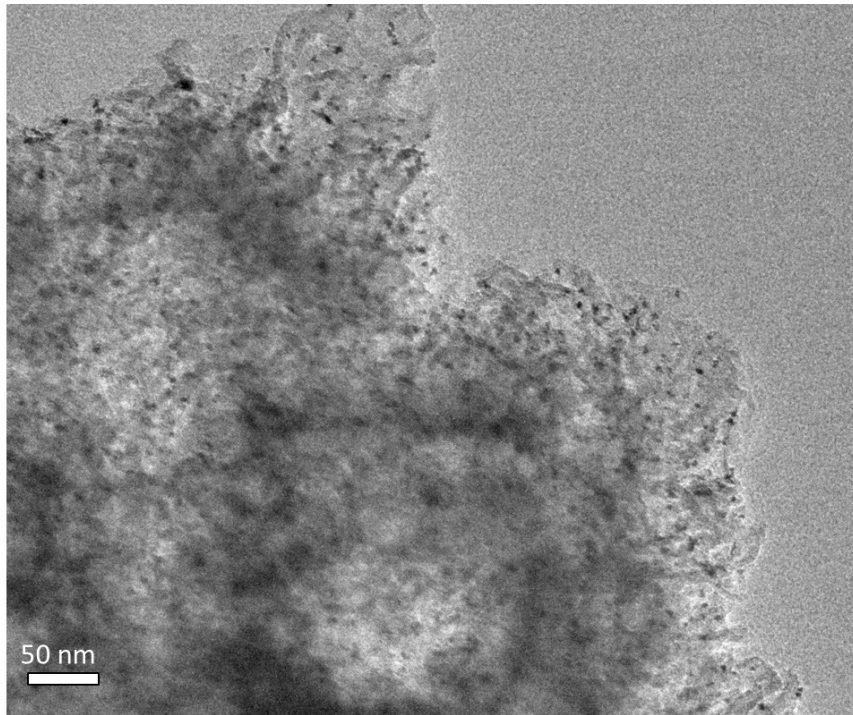

**Fig. S5.** TEM image of Pt@PC-POP after catalytic hydrolysis of AB.
